# Supplementary material for: SET oncoprotein accumulation regulates transcription through DNA demethylation and histone hypoacetylation
Source: PubMed Central journal article supplement (PMC5432298; doi:10.18632/oncotarget.15818), 2017-03-01
Supplement: oncotarget-08-26802-s001.pdf [file oncotarget-08-26802-s001.pdf]

## SET oncoprotein accumulation regulates transcription through DNA demethylation and histone hypoacetylation

### Supplementary Materials

**Supplementary Table 1: Primers of real time PCR assay**

| <i>GENE</i>  | <i>SEQUENCE (5'-3')</i>   | <i>SIZE (bp)</i> |
|--------------|---------------------------|------------------|
| ATF2 (F)     | ATGGTAGCGGATTGGTTAGG      | 120              |
| ATF2 (R)     | TTTGGGTCTGTGGAGTTGTG      |                  |
| ATF3 (F)     | GCCCCTGAAGAAGATGAAAG      | 138              |
| ATF3 (R)     | TTCAGCATTACACTTTCCA       |                  |
| β-GLOBIN (F) | GCCTCGCTGTCCACCTTCCA      | 124              |
| β-GLOBIN (R) | AGAAAGGGTGTAAACGCAACTAAG  |                  |
| CTNNB1 (F)   | GTATGAGTGGGAACAGGGATT     | 117              |
| CTNNB1 (R)   | GTCTCAGGGAACATAGCAGC      |                  |
| GAPDH (F)    | GACTTCAACAGCGACACCCACTC   | 126              |
| GAPDH (R)    | GTCCACCACCCTGTTGCTGTAG    |                  |
| GSTP-1 (F)   | GCAAATACATCTCCCTCATCTACAC | 165              |
| GSTP-1 (R)   | AGCAGGTTGTAGTCAGCGAAGGAG  |                  |
| HIF-1A (F)   | GCCGAGGAAGAACTATGAACA     | 152              |
| HIF -1A (R)  | AATGGGTTCAAAATCAGCA       |                  |
| MYB (F)      | GGCACACAAGAGACTGGGGA      | 155              |
| MYB (R)      | CTGGCTGGCTGGCTTTTGAA      |                  |
| NFATC3 (F)   | GCCACGCCGATGACTACTGC      | 134              |
| NFATC3 (R)   | TGCACAATCATCTGGCTCAAG     |                  |
| RELA (F)     | GAATCCAGTGTGTGAAGAAGC     | 122              |
| RELA (R)     | CACAGCATTCAAGTTCGTAGTC    |                  |
| STAT1 (F)    | TAGTGGAGTGGAAGCGGAGA      | 162              |
| STAT1 (R)    | CGTAGGTGTATTTCTGTTCCA     |                  |

**Supplementary Table 2: Primers of chromatin immunoprecipitation (ChIP) assay**

| <i>GENE</i> | <i>SEQUENCE (5'-3')</i> | <i>SIZE (bp)</i> |
|-------------|-------------------------|------------------|
| GSTP-1 (F)  | CCTCTCCCCTGCCCTGTGAAG   | 380              |
| GSTP-1 (R)  | GGCGAAACTCCAGCGAAGGC    |                  |
| HIF-1A (F)  | GAAAGAGAGCAGGAGCATTACA  | 290              |
| HIF-1A (R)  | AAGTCCCCACCCCAGCCCAC    |                  |
| NFATC3 (F)  | GGAGACCGATAACCCTGTGTGT  | 284              |
| NFATC3 (R)  | AATAGATGAAAAACCCAGTGCG  |                  |
| NFκB1 (F)   | CGTGGGAGGAGGTTGACAGTAG  | 264              |
| NFκB1 (R)   | CCAACCACCTTCCCTCTCTCCT  |                  |
| PTEN (F)    | GAGGGGAAAGATGCTCGACT    | 232              |
| PTEN (R)    | GAGGCGAGGATAACGAGCTA    |                  |
